# Supplementary material
Source: PubMed Central journal article supplement (PMC4460444)
Supplement: pnas.201502742SI.pdf [file pnas.201502742SI.pdf]

# Supporting Information

Peterson et al. 10.1073/pnas.1502742112

## SI Text

The  $\beta_2$  adrenergic receptor ( $\beta_2$ AR) was originally mutated based on the crystal structure of rhodopsin (1) to yield a  $\beta$ -arrestin biased  $\beta_2$ AR termed  $\beta_2$ AR-TYY. These residues were mutated in D<sub>2</sub>R (Fig. S1A); however, robust separation between G-protein and  $\beta$ -arrestin pathways was not achieved. Therefore, EA was used to predict the phenotypes of single point mutations (Table S1). The ET predicted residues (TYY) were mutated to different amino acids, depending on their harshness score. EA was used in four rounds of ET-guided residue determination [mapped to D<sub>3</sub>R (2) in Fig. S1B] that were carried out with the development of the more complex ET algorithm piET (Fig. S1C) and as more detailed crystal structures were solved including the C terminus of G<sub>out</sub> in complex with rhodopsin (Fig. S1D) (3) and  $\beta_2$ AR in complex with G<sub>αβγ</sub> (Fig. S1E) (4). The four rounds of ET-guided mutagenesis are depicted in a traditional snake-like plot of D<sub>2</sub>R in Fig. 1A with residues highlighted with the same color scheme as Fig. S1 A–E. Finally, each point mutation was tested for G protein,  $\beta$ -arrestin, and plasma membrane phenotypes and scored according to their activity profiles (Fig. S2A). The mutants that preserved activity at either G protein or  $\beta$ -arrestin were further combined to yield a rich landscape of functionally selective mutants (Fig. S2 B–D). However, <sup>[G<sup>prot</sup>]</sup>D<sub>2</sub>R and <sup>[β<sup>arr</sup>]</sup>D<sub>2</sub>R were chosen from the double point mutants for further characterization because of their robust separation of function and preservation of <sup>[WT]</sup>D<sub>2</sub>R's other major functions (Fig. 2).

## SI Materials and Methods

**G-Protein Activity.** D<sub>2</sub>R's ability to inhibit cAMP production was carried out as previously described (5) using the Promega GloSensor assay with minor modifications. D<sub>2</sub>R was expressed with 1 μg of DNA and the GloSensor construct was transiently transfected along with 5 μg of D<sub>2</sub>R DNA. The luminescence was quantified with the Mithras LB940 instrument with no wavelength filter between the cells and the photomultiplier.

**Bioluminescent Resonance Energy Transfer.** BRET was performed as previously described (6).

**Radioligand Binding.** [<sup>3</sup>H]-raclopride (Promega) binding was carried out as previously described (7).

**ERK Phosphorylation by Western Blot.** HEK 293T cells were transiently cotransfected with 2.5 μg of mutant D<sub>2</sub>R or pcDNA (for untransfected control) and 1 μg of either pcDNA or  $\beta$ -arrestin 2-YFP (the same BRET construct). After 24 h, cells were starved in serum-free DMEM, and 24 h later, cells were stimulated with 1 μM quinpirole for 10 min. Then cells were lysed in ice-cold RIPA buffer containing protease and phosphatase inhibitor mixtures (Sigma). Lysates were blotted for p-ERK (Cell Signaling Technology, #9106) and total ERK (Cell Signaling Technology, #9102).

**Receptor Internalization Assay.** All D<sub>2</sub>R constructs have an N-terminal triple HA-tag, and internalization was performed as previously described (8). Percent internalization was determined from unstimulated receptor expressing cells.

**Confocal Microscopy.** HEK 293T cells were transiently transfected with YFP C-terminally tagged to D<sub>2</sub>R and plated onto 5% fibronectin treated glass bottom culture dishes. The cells were cultured and imaged as previously described (9) with minor modifications. Cells were cultured for 24 h post transfection, and images were captured on live cells.

**MAP Kinase Transcriptional Activity Reporter.** The SRF and SRE transcriptional reporter was assessed as previously described (10) with minor modifications. The cells were transfected using the calcium phosphate method described here, with 1 μg of D<sub>2</sub>R DNA and 5 μg of SRF or SRE reporter DNA. Finally, the cells were incubated in serum-free DMEM overnight rather than using serum replacement medium.

**Adeno-Associated Viral Expression Vectors.** The triple HA-D<sub>2</sub>R constructs had NheI and AscI sites cloned onto the 5' and 3' end of D<sub>2</sub>R, respectively. This construct was ligated into the NheI and AscI sites of the pAAV-EF1a-DIO EYFP construct provided by the laboratory of Karl Deisseroth. The YFP was replaced with D<sub>2</sub>R.

**Adeno-Associated Virus Production.** The constructs were packaged into pseudotyped AAV 2/10 using the triple-transfection technique, as previously described (11), which produces helper free virus. The titer was determined to be  $\sim 1 \times 10^{13}$  vector genome copies per mL for each virus.

**Mouse Stereotaxic Injection for Viral Delivery.** Mice were anesthetized under 1–2% isoflurane, and the coordinates from bregma for striatal viral delivery were AP = +1.1 mm, ML =  $\pm 1.7$  mm, and DV = -2.9 mm for dorsal and -4.0 mm for ventral striatum. 0.75 μL of virus was injected into each site, for a total volume of 3 μL per mouse. The mice were allowed to recover for 2–4 wk, and then behavioral experiments were performed.

**Locomotor Activity.** The Accuscan activity monitor (Omnitech Electronics, Inc.) was used to assess locomotor activity, as previously described (7).

**HA Staining of Virally Transduced Brains.** Transduced brains were fixed by perfusion of the mouse and left overnight in 4% PFA in PBS. 30 μM sections were collected by vibratome sectioning and stained by free-floating in 0.3% triton-X in PBS supplemented with 2% NGS and 3% BSA. The HA antibody (3724; Cell Signaling) was diluted 1:1,000 and allowed to incubate overnight.

- Shenoy SK, et al. (2006) beta-arrestin-dependent, G protein-independent ERK1/2 activation by the beta2 adrenergic receptor. *J Biol Chem* 281(2):1261–1273.
- Chien EY, et al. (2010) Structure of the human dopamine D3 receptor in complex with a D2/D3 selective antagonist. *Science* 330(6007):1091–1095.
- Scheerer P, et al. (2008) Crystal structure of opsin in its G-protein-interacting conformation. *Nature* 455(7212):497–502.
- Rasmussen SG, et al. (2011) Crystal structure of the  $\beta_2$  adrenergic receptor-Gs protein complex. *Nature* 477(7366):549–555.
- Allen JA, et al. (2011) Discovery of  $\beta$ -arrestin-biased dopamine D2 ligands for probing signal transduction pathways essential for antipsychotic efficacy. *Proc Natl Acad Sci USA* 108(45):18488–18493.

- Masri B, et al. (2008) Antagonism of dopamine D2 receptor/beta-arrestin 2 interaction is a common property of clinically effective antipsychotics. *Proc Natl Acad Sci USA* 105(36):13656–13661.
- Urs NM, Snyder JC, Jacobsen JP, Peterson SM, Caron MG (2012) Deletion of GSK3 $\beta$  in D2R-expressing neurons reveals distinct roles for  $\beta$ -arrestin signaling in antipsychotic and lithium action. *Proc Natl Acad Sci USA* 109(50):20732–20737.
- Espinoza S, et al. (2011) Functional interaction between trace amine-associated receptor 1 and dopamine D2 receptor. *Mol Pharmacol* 80(3):416–425.
- Snyder JC, Rochelle LK, Lyerly HK, Caron MG, Barak LS (2013) Constitutive internalization of the leucine-rich G protein-coupled receptor-5 (LGR5) to the trans-Golgi network. *J Biol Chem* 288(15):10286–10297.

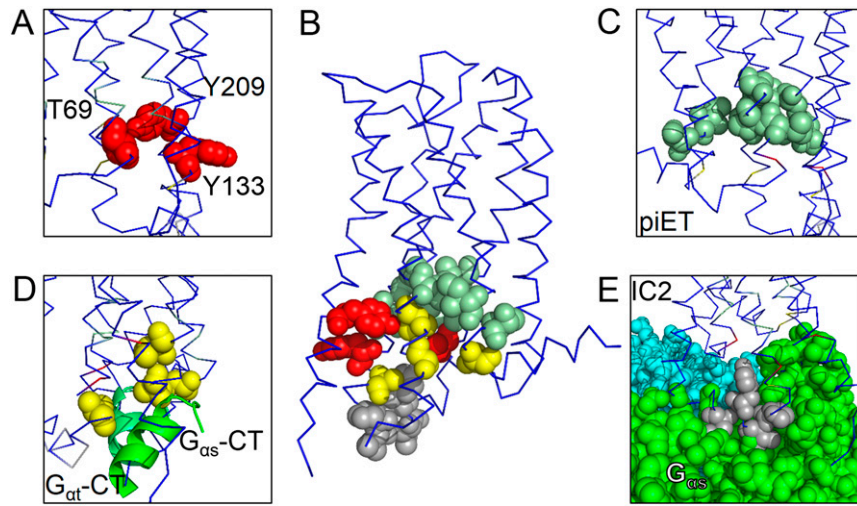

**Fig. S1.** Evolutionary Trace of  $D_2R$  facilitated by advances in crystallography and algorithm design. (A) TYY mapped onto  $D_3R$  (2) (PDB ID 3PBL in red). (B) Four rounds of ET predicted residues for mutagenesis mapped onto  $D_3R$ . (C) piET (green residues depicted as spheres). (D)  $G\alpha$ -CT proximity (3) (PDB ID 3DQB residues in yellow;  $G\alpha$ -CT is represented as a green  $\alpha$ -helix cartoon) and (E)  $G\alpha\beta\gamma$  (4) (PDB ID 3SN6  $\alpha$  is green and  $\beta$  is blue) interaction with IC2 of  $D_3R$  (gray spheres).

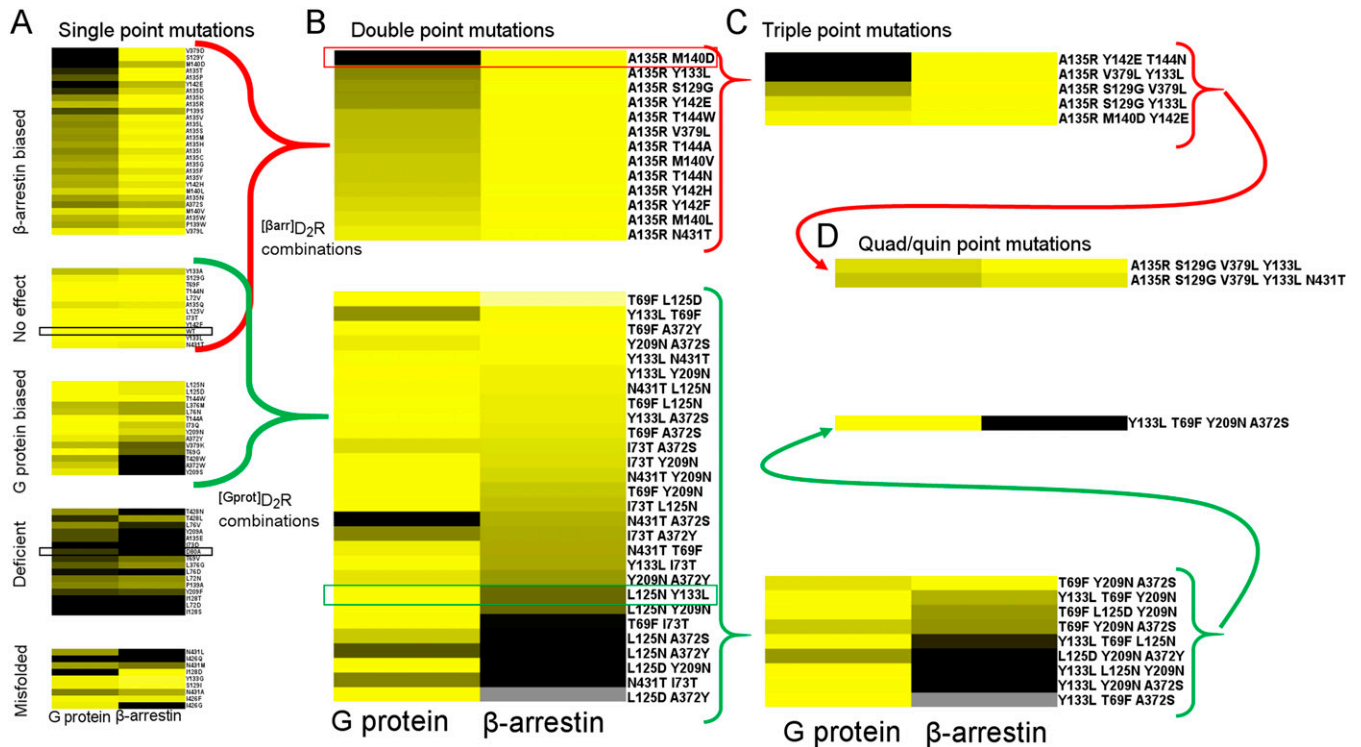

**Fig. S2.** G-protein and  $\beta$ -arrestin activity of ET predicted mutants. Dose–response curves for each mutant were normalized to a WT control that was performed the same day and the  $\log(\tau/K_A)$  was calculated. Because all values were normalized to WT,  $\tau = 1$  and  $K_A = 1$  for WT; thus, 0 is depicted as yellow, and  $-3$  (100 log fold shift in  $\tau/K_A$ ) is depicted as black in the heat maps. (A) G-protein and  $\beta$ -arrestin activity of single point mutations generated mutants that were misfolded, mutants that were biased toward G protein or  $\beta$ -arrestin, or mutants that had little to no effect on any tested function. (B) Mutations that had no effect on the desired pathway (red lines for  $\beta$ -arrestin and green for G protein) were combined into double point mutations and (C) triple and (D) quadruple and one quintuple. The mutations that are further characterized in Fig. 2 are highlighted in boxes.
